# Supplementary material for: A positive feedback loop involving the Spa2 SHD domain contributes to focal polarization
Source: PLOS journal article supplement (doi:10.1371/journal.pone.0263347), 2022-02-08
Supplement: S4 (10.1371/journal.pone.0263347.s004) [file journal.pone.0263347.s004]

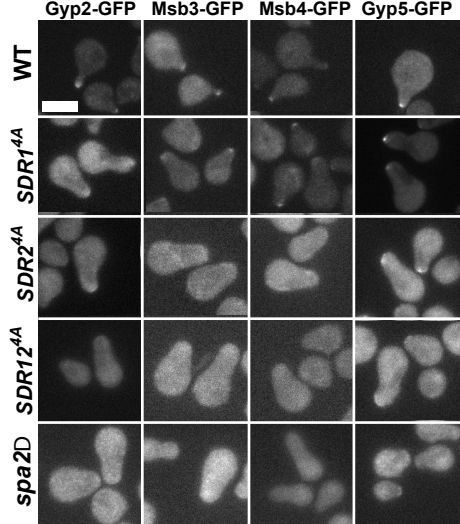

**S4 Fig.** Localization of Msb/Gyp proteins in *spa2* mutant backgrounds. Gyp2, Msb3, Msb4, and Gyp5 were tagged with GFP in wild-type (WT), *SDR1<sup>4A</sup>*, *SDR2<sup>4A</sup>*, *SDR12<sup>4A</sup>*, and *spa2<sup>D</sup>* strains. Imaging was performed after 2h pheromone treatment. Some of these data (Msb3-GFP and Msb4-GFP) are reproduced in Figure 3B of the main text. Gyp2-GFP and Gyp5-GFP show some polarization in the *SDR2<sup>4A</sup>* strain, whereas Msb3-GFP and Msb4-GFP do not. Gyp5-GFP also shows some polarization in the *SDR12<sup>4A</sup>* and *spa2<sup>D</sup>* strains, whereas Msb3-GFP and Msb4-GFP do not. Scale bar = 5  $\mu$ m.
